# 1 Study of Oak Ridge soils using BONCAT-FACS-Seq reveals that a 2 large fraction of the soil microbiome is active

3

4 Estelle Couradeau<sup>1</sup>, Joelle Sasse<sup>1</sup>, Danielle Goudeau<sup>2</sup>, Nandita Nath<sup>2</sup>, Terry C. Hazen<sup>3,4</sup>, Benjamin P.  
5 Bowen<sup>2</sup>, Rex R. Malmstrom<sup>2</sup>, Trent R. Northen<sup>1,2\*</sup>

6

7 <sup>1</sup>Environmental Genomics and Systems Biology, Lawrence Berkeley National Laboratory, Berkeley,  
8 California, USA

9 <sup>2</sup>Joint Genome Institute, Department of Energy, Walnut Creek, CA, USA

10 <sup>3</sup>University of Tennessee, Knoxville, TN, USA

11 <sup>4</sup>Oak Ridge National Laboratory, Oak Ridge, TN, USA

12

13 Correspondence to: \*TRNorthen@lbl.gov

14

## 15 **Abstract**

16 The ability to link soil microbial diversity to soil processes requires technologies that differentiate  
17 active subpopulations of microbes from so-called relic DNA and dormant cells. Measures of microbial  
18 activity based on various techniques including DNA labelling has suggested that most cells in soils are  
19 inactive, a fact that has been difficult to reconcile with observed high levels of bulk soil activities. We  
20 hypothesized that measures of *in situ* DNA synthesis may be missing the soil microbes that are  
21 metabolically active but not replicating, and we therefore applied BONCAT (Biorthogonal Non  
22 Canonical Amino Acid Tagging) i.e. a proxy for activity that does not rely on cell division, to  
23 measure translationally active cells in soils. We compared the active population of two soil depths from  
24 Oak Ridge (TN) incubated in the same condition for up to seven days. Depending on the soil, a maximum  
25 of 25 – 70% of the cells were active, accounting for 3-4 million cells per gram of soil, which is an order  
26 of magnitude higher to previous estimates. The BONCAT positive cell fraction was recovered by  
27 fluorescence activated cell sorting (FACS) and identified by 16S rDNA amplicon sequencing. The  
28 diversity of the active fraction was a selected subset of the bulk soil community. Excitingly, some of the  
29 same members of the community were recruited at both depths independently from their abundance rank.  
30 On average, 86% of sequence reads recovered from the active community shared >97% sequence  
31 similarity with cultured isolates from the field site. Our observations are in line with a recent report that,  
32 of the few taxa that are both abundant and ubiquitous in soil, 45% are also cultured – and indeed some of

33 these ubiquitous microorganisms found to be translationally active. The use of BONCAT in soil provides  
34 evidence that a large portion of the soil microbes can be active simultaneously. We conclude that  
35 BONCAT coupled to FACS and sequencing is effective for interrogating the active fraction of soil  
36 microbiomes *in situ* and provides new perspectives to link metabolic capacity to overall soil ecological  
37 traits and processes.

38

### 39 **Introduction**

40 Soil communities are composed of thousands of species that assemble populations of millions to  
41 billions of cells within each gram of material <sup>1,2</sup>. Together, they perform key nutrient cycling functions  
42 that as a collective are dominant contributors to Earth's biogeochemical cycles<sup>3</sup>. Next generation  
43 sequencing techniques have enabled the detailed description of the microbial taxa inhabiting soils <sup>4</sup>, and  
44 their comparison across large sets of samples with the aim of pinpointing the drivers of the microbial  
45 diversity <sup>3,5,6</sup>. This enables measurement of the patterns of diversity that emerge in soils, especially in  
46 terms of correlation with edaphic factors, such as pH <sup>7</sup>, soil texture <sup>8</sup> or moisture content <sup>9</sup>, or biological  
47 factors, such as species-species interaction, life strategy <sup>10</sup> or rank abundance <sup>6</sup>. Yet, it is challenging to  
48 extrapolate from microbial abundance to function, and it is impossible to scale-up these observations to  
49 the macroscale<sup>11</sup>. For instance, it is still challenging to predict in a quantitative way the impact that  
50 temperature change will have on decomposition and remobilization of soil organic matter<sup>12</sup>. In order to  
51 better couple soil function to microbial activity, one would have to take into account that (i) a large  
52 fraction (~40%) of the microbial diversity retrieved in soils by molecular methods might come from  
53 physiologically compromised cells, free DNA <sup>13</sup> or dormant cells <sup>14</sup> and (ii) that microbial activity in the  
54 soil will be constrained by geochemical heterogeneities that vary at the microscale<sup>15</sup>. The development of  
55 complementary technologies that probe active cells *in situ* will therefore provide an avenue to better link  
56 microbial diversity to soil microbial activities <sup>16</sup>.

57 Probing active microorganisms *in situ* has been traditionally achieved by using stable isotope  
58 probing (SIP) or bromodeoxyuridine (BrdU) labeling. SIP encompasses a series of methods that involve  
59 the incorporation of heavy isotopes into newly synthesized DNA<sup>17</sup> and its separation on a density gradient  
60 <sup>18</sup>. SIP using labeled <sup>13</sup>C compounds has shed light onto how the soil microbiome metabolizes certain  
61 molecules of interest such as cellulose <sup>19</sup> and was also used to track newly formed cells by labeling them  
62 with H<sub>2</sub><sup>18</sup>O <sup>20</sup>. More recently, BrdU DNA immunocapturing was implemented in soils, BrdU is a  
63 thymidine analog that gets incorporated into DNA in cells undergoing replication, enabling DNA  
64 immunocapturing using BrdU antibodies <sup>21,22,23</sup>. These methods coupled to high throughput sequencing  
65 have enabled the examination of active microbes; however they only capture cells that have undergone  
66 division while many cells in soils may be metabolically active yet not replicating. Importantly these

67 methods quantify the amount of labelled DNA rather than the number of active cells in the soil, which can  
68 lead to an underestimation of the active fraction given that a large fraction of soil DNA might be relic  
69 DNA from physiologically impaired cells<sup>13</sup>.

70 Other techniques, mostly based on the so called “live/dead” fluorescent DNA stain, attempted to  
71 quantify the fraction of active cells in soil through direct count and found an average of 1.9% cells to be  
72 active<sup>24</sup>. In a situation where cells in soil are ~10 microns apart from each other on average<sup>25</sup>, and only  
73 1.9% of them are active, it is difficult to imagine how these cells would control carbon dynamics<sup>26</sup>, and  
74 establish complex metabolic networks capable of coordinated responses to changes of conditions<sup>10,27,28</sup>.  
75 We hypothesized that at least at some point in time, more cells should be active in order to maintain  
76 microbial diversity<sup>29</sup> and to explain the dynamic of taxa abundance and respiration fluctuation measured  
77 in soil<sup>28</sup>. We further expected that some cells may be metabolically active but slowly replicating and that  
78 these could potentially be detected through labeling biomolecules that have a faster turnover than the  
79 genomic DNA, such as proteins<sup>16</sup>.

80 Recently, Biorthogonal Non Canonical Amino Acid Tagging (BONCAT) was reported as an  
81 approach to characterizing the active fraction of marine sediment communities<sup>30,31</sup>. This approach uses a  
82 relatively fast procedure and small amounts of material, attributes that make it an appealing experimental  
83 procedure. This technique consists of incubating the sample with homopropargylglycine (HPG), a water  
84 soluble analog of methionine, containing an alkyne group, which is incorporated into newly synthesized  
85 proteins<sup>32,33</sup>. Fluorescent dyes are then conjugated to HPG-containing proteins using an azide-alkyne  
86 “click chemistry” reaction<sup>32</sup>. As a consequence, cells that were translationally active during the incubation  
87 are fluorescently labeled and can be specifically recovered using fluorescence activated cell sorting  
88 (FACS)<sup>34</sup>. BONCAT labels newly made proteins and therefore does not rely on cell division and DNA  
89 synthesis to occur, facilitating short term incubations (minutes to hours) and interrogation of slow  
90 dividing cells. The sequencing of BONCAT-labeled, FACS-recovered cells could thus be a convenient  
91 method to provide a snapshot of the active portion of a soil microbiome.

92 Here, to our knowledge, we report the first use of BONCAT probing of active members of the  
93 soil microbiome, as well as the integration of BONCAT with FACS cell sorting and sequencing of the  
94 active cells. For these studies, we incubated undisturbed soils from the Oak Ridge Field Research Site  
95 (ORFRS) site with HPG, and sorted labeled cells using FACS. The composition of the active community  
96 was determined through 16S ribosomal gene amplicon sequencing. The results were compared with the  
97 composition of the total soil microbiome as well as to the ~700 isolates collected from the same field site.  
98 These analyses reveal that a large fraction of the microbiome was translationally active—as high as 25–  
99 70% of cells, which is an order of magnitude higher to previous estimates. Further, a large fraction of the

100 active cells whose taxonomy was resolved were close phylotypes of existing isolates and of major soil  
101 taxa identified in a recent global soil survey<sup>35</sup>.

102

## 103 **Results and Discussion**

104

### 105 **HPG is actively incorporated by cells *in situ***

106 We evaluated the utility of BONCAT for identifying translationally active cells from soil systems  
107 consisting of a highly heterogeneous matrix, and for the first time, we coupled BONCAT with FACS to  
108 detect and recover individual active cells, as opposed to microbial aggregates consisting of hundreds of  
109 cells<sup>34</sup>, in order to only sequence the active members of the community. Soil samples were collected at  
110 the Oak Ridge Field Research Site (ORFRS) in Oak Ridge, TN, USA and were horizontally cored at 30  
111 cm and 76 cm below surface for the analyses of two distinct communities (Figure 1A). Both depths had  
112 low organic carbon (~0.15%), and nitrogen (<0.05 %) content, and no detectable amount of phosphorus  
113 (Figure S1). The 30 cm soil had more quartz and less mica than the 76 cm sample that was composed of  
114 more clay. None of these samples had detectable amount of methionine based on LC-MS and therefore it  
115 is unlikely that there was significant competition for incorporation of the 50  $\mu$ M non-canonical  
116 methionine (HPG) (Figure S2).

117 We first confirmed that HPG was actively incorporated by the cells *in situ*. To do so, we  
118 performed a killed control experiment on the 76 cm soil with duplicate samples for each treatment  
119 condition. Cells were either fixed before or after incubation with HPG. Cells fixed prior to HPG  
120 incubation were not labeled by the BONCAT azide dye, nor were the unfixed cells incubated without  
121 HPG. In contrast, both unfixed cells and cells fixed after HPG incubation acquired a distinct green  
122 fluorescence signal corresponding to the BONCAT dye. The fraction of fluorescent cells and the per-cell  
123 fluorescence intensities were similar between unfixed and post-incubation fixed cells (Figure S3). This  
124 confirmed that HPG was only incorporated by active cells, and that fixation was not required for the  
125 cycloaddition of the BONCAT azide fluorescent dye. Therefore, all additional experiments were  
126 performed with unfixed cells.

127

### 128 **Bias introduced by capturing the cells on a filter as part of the BONCAT procedure**

129 Although the HPG incubation was performed on a minimally disturbed soil sample (directly  
130 transferred from the soil core), the cells needed to be detached from the soil matrix and captured on a 0.2  
131  $\mu$ m filter (see methods) for the click reaction, and subsequently detached again for FACS analysis. We  
132 evaluated the bias introduced by these two steps on the microbial community structure, as some cells  
133 might detach preferentially from the soil as compared to other being more firmly attached, and the

134 fraction of cells smaller than  $0.2 \mu\text{m}^{36}$  might be lost in the filtration step. For this, we compared the  
135 microbial communities retrieved from total soil to the communities captured on the filter.

136 The microbial community structure retrieved from the total DNA of the 30 cm and 76 cm soil  
137 differed at the phylum level (Figure 2A). For example, the 30 cm soil was dominated by Acidobacteria as  
138 well as candidate phyla AD3 and GAL15. The 76 cm soil was largely dominated by Proteobacteria with a  
139 higher fraction of Bacteroidetes than found in 30 cm soil. At the exact variant sequence (ESV) level, the  
140 most abundant ESV at both depths was an Alphaproteobacterium genus *Aquamicrobium* that accounted  
141 for 8.77% and 72.9% of the analyzed sequences from 30 cm full soil and 76 cm full soil, respectively.  
142 This OTU was only partially captured on the  $0.2 \mu\text{m}$  filters (it represented 2.4% and 3.1% respectively for  
143 the 76 cm and the 30 cm filters). The number of OTUs (ESVs clustered at 97% similarity) captured on the  
144 filters for the 30 cm sample was half the number retrieved from the total soil, whereas the number  
145 captured at 76 cm filters captured greater than or equal to the full soil sample in average (Table S1). The  
146 OTUs that were present on the 76 cm filter sample and not retrieved in the soil were found in low  
147 abundance ( $< 0.1\%$ ) and might have come from the rare members of the soil microbiome. Since we  
148 observed that the filtering (which was used for the BONCAT cells) introduced a bias, we used the total  
149 cells captured on a filter for further comparison with the BONCAT sorted fractions.

150

### 151 **BONCAT labeling challenges our view of the active fraction of soil microbes**

152 To identify individual active cells within soils, samples from 30 cm and 76 cm were incubated  
153 with HPG and sampled at various time points up to one week (168 h), followed by fluorescent labeling.  
154 The total number of cells per gram of soil was stable throughout the incubation period, with  $\sim 20$  million  
155 cells  $\text{g}^{-1}$  soil at 30 cm and  $\sim 5$  million cells  $\text{g}^{-1}$  soil at 76 cm (Figure 1B), indicating there was neither acute  
156 toxicity leading to massive cell loss nor a stimulation leading to a population bloom during the  
157 incubations. While total cell numbers held steady, the fraction of BONCAT+ (Figure 1C) cells increased  
158 over time in both soil samples (Figure S4), with a distinct rate of labeling and fraction of labeled cells  
159 detected for both soil samples. For example, cells from the 76 cm soil were labeled quickly (clear  
160 BONCAT+ population were visible as early as 30 min after incubation) and  $\sim 60\%$  of all cells were  
161 labeled by 48 h, whereas cells from the 30 cm soil were labeled more slowly (no BONCAT labeling after  
162 1 h) and only  $\sim 20\%$  total cells were labeled after 48 h (Figure 1D). These differences, which were  
163 consistent among biological replicates, suggest that the microbial community found at 76 cm was  
164 composed primarily of active cells, while the community at 30 cm had a larger fraction of inactive cells.

165 Soil activity has traditionally been assessed via bulk measurement of microbial processes (such as  
166  $\text{CO}_2$  evolution or enzymatic activities)<sup>37</sup>, however, both the realization that bulk measurements were  
167 poor predictors of soil processes<sup>11</sup> and that the soil organic matter (including the recalcitrant fraction) is

168 composed of small organic molecules of microbial origin<sup>38</sup> motivate our examination of active soil  
169 microbes at the single cell level. Previous attempts have reported that only a small fraction of cells (0.1 –  
170 2%) are active at once<sup>14</sup>, shaping the view that most soils microbes are dormant and constitute a ‘seed  
171 bank’ whose members can turn active under favorable conditions<sup>29</sup>. These observations along with the  
172 realization that the percent of soil surface area covered by microorganisms might be as low as 10<sup>-6</sup> %<sup>39</sup>,  
173 and that the localization of soil bacteria *in-situ* still eludes us<sup>40</sup>, contradict the intuition that a large  
174 fraction of the cells should be active to account for the observed bulk activities. The soils that we  
175 analyzed here showed that 20 % cells or more were active at both depths, and that this value can be  
176 reached within 30 min of incubation, as shown for the 76 cm soil. The high number of active cells we  
177 found is an order of magnitude higher than previous estimates, and might be partially explained by the  
178 fact that it is a fraction of the soil intact cell detached from the soil, and not of the total cells.  
179 Nevertheless, our study shows that there are more active cells than previously thought per gram of soil, a  
180 fact that support the sequences based network approaches to interrogate soil microbiomes. If a large  
181 fraction of cells are co-active it is more likely that they will be able to metabolically interact.

182

### 183 **The BONCAT+ fraction forms a selected sub-set of the total community**

184 To determine the identity of active cells, we sequenced the 16S ribosomal marker genes of  
185 BONCAT+ cells from 30 cm and 76 cm soil samples. Specifically, triplicate collections of BONCAT+  
186 cells recovered by FACS (2 h incubation of the 76 cm sample and 48 h incubations of the 76 cm and 30  
187 cm samples) were characterized using iTag sequencing (Table S1). Both soils were sequenced for the 48  
188 h time point, as it represents the beginning of the plateau phase of the BONCAT labeling for both cores  
189 (Figure 1D). For the 76 cm soil, the 2 h time point was also sequenced to identify early responders.  
190 Unlabeled cells (BONCAT-) were also sorted and sequenced from these time points (Figure S1). In order  
191 to compare the BONCAT sorted fractions to the total community at a large scale, we plotted the rank vs.  
192 abundance of all libraries (Figure 2B). This plot clearly shows that the BONCAT+ populations separate  
193 from the rest of the samples, with a steeper slope reflecting a faster drop of diversity at higher ranks. The  
194 pattern for BONCAT- samples was similar to the total community captured on a 0.2 µm filter. In order to  
195 assess if this difference was from compositional variation, a beta-diversity metric (Bray-Curtis distance)  
196 was computed and ordinated with pairwise distances between samples (Figure 2C). The resulting NMDS  
197 plot revealed that all the BONCAT+ sorted fractions from both the 30 cm and the 76 cm formed a distinct  
198 group from the rest of the samples (Adonis,  $F = 2.65$ ,  $p$  value = 0.001). These results indicate that the  
199 pools of BONCAT- cells, although of lower diversity compared to the control total soil and filter samples,  
200 were a random subset of the total communities’ analyzed, while the BONCAT+ fraction was clearly  
201 composed of a distinct and reproducible subset of the community.



202 Analyzing the phylogeny of the BONCAT+ samples at the phylum level, we found that at 30 cm,  
203 the active fraction was dominated by Actinobacteria (Figure 2A), with one *Arthrobacter* OTU  
204 encompassing ~51% of the retrieved sequences on average (“h” Figure 3A), while the 76 cm active  
205 population was dominated by Proteobacteria. At the OTU level (ESVs clustered at 97% similarity)  
206 (Figure 3), the BONCAT responders OTU h-e-f were highly active at both 30 cm and 76 cm independent  
207 of their abundance in the parent population. For instance, OTU h *Arthrobacter* was only recovered at low  
208 abundance (rank 214) from the total cells captured on a filter, while it is the most abundant OTU in the  
209 BONCAT+ fraction for this sample. This observation suggests that the activity of these very prominent  
210 responders was driven more by the incubation condition than by their rank in the parent community. By  
211 contrast, the most abundant members of the 76 cm community (OTU a Figure 3) were BONCAT-,  
212 indicating that they did not respond to this incubation condition.

213 Although we are confident that the BONCAT + fraction is composed of translationally active  
214 cells, the relative proportion of the OTUs within each library is to be interpreted with some caution,  
215 because of factors including potential biases from PCR when producing the iTags libraries<sup>41,42</sup>, and  
216 sorting (in the detachment from the filter and DNA staining steps) that impacted estimates of relative  
217 abundance. More precisely, a few OTUs account for the majority of the sequences retrieved in the  
218 BONCAT fraction, while their abundance were lower in the total community. Given that the size of the  
219 total population did not vary during the incubation, this can be explained by two non-exclusive  
220 hypotheses: (i) some technical bias in determining relative abundance or (ii) real growth of certain OTUs  
221 perfectly balanced by loss of other members. While our experimental design does not allow us to  
222 distinguish between microbes that were already active and the ones that were activated the incubation, it  
223 seems reasonable to assume that the signal we measured is a mix of both types.

224 Another interesting finding from this study is that the BONCAT+ signal plateaued at around ~4  
225 million active cells per gram of soil, independently of the size of the total population. This raises an  
226 interesting hypothesis of a resource limit within these samples that controlled the total number of active  
227 cells in each soil sample. To explain the persistence of the inactive members of the community, especially  
228 the abundant ones (such as OTU a which is the most abundant OTU at 30 cm), we suggest that they must  
229 thrive under other sets of parameters that they encounter in the field but not in our experimental setup. In  
230 addition, it is possible that some of the BONCAT- are false negative due to their inability to incorporate  
231 HPG. At this point, it is difficult to estimate the bias introduced by the preferential incorporation of HPG  
232 to certain species compared to others, but the fact that BONCAT+ cells belonged to 251 different OTUs  
233 spanning 17 bacterial phyla and accounted for up to ~70% of the detachable cells, suggests, as previously  
234 noted<sup>34</sup>, that HPG is in fact incorporated by a large set of bacterial species.

235 We see that BONCAT labeling probes a variety of organisms, many of which are not cultivated.  
236 Therefore, BONCAT could also serve the purpose of pinpointing relevant culture conditions for to date  
237 uncultivated microbes to be active, and from which they might be isolated more easily than from standard  
238 laboratory conditions. For instance, the AD3 candidate division was first proposed in 2003 from a study  
239 of sandy soils<sup>43</sup> and was repeatedly found in soil since then. However, there is still no cultivated  
240 representative of this phylum reported. We found activity for some AD3 members under our selected  
241 incubation conditions, which thus provide a new starting point for cultivation efforts for this phylum.

242

### 243 **BONCAT responders closely related to cultured and generally abundant soil organisms**

244 We further asked how the culture collection available for this experimental site captured the  
245 diversity of the active, and presumably ecologically relevant, fraction of the community. For this, we  
246 compared 16S sequences of BONCAT+ cells and total cells libraries (both total soil and cells captured on  
247 a filter) to 16S sequences from 687 isolates collected from this same location. Surprisingly, 77% to 98%  
248 of total sequences from BONCAT+ cells shared >97% sequence similarity with an isolate collected from  
249 the same location—consistent with the view that the active microbes lend themselves to isolation. This is  
250 despite the fact that when looking at the total community of cells (filter sample), only 7% and 2% of the  
251 total sequence reads from the 76 cm and the 30 cm respectively shared >97% sequence similarity with the  
252 isolates, suggesting the isolated OTUs were not part of the dominant members of the community (Figure  
253 4A).

254 It is interesting that in our incubation condition, abundant OTUs (e, f, h and i, Figure 3) with  
255 close cultured representatives were translationally active in an oligotrophic soil (~0.15% TOC) without  
256 any addition of nutrient other than HPG. Importantly, the cell counts remained stable throughout the  
257 incubation (Figure 1B), suggesting that the predominance of these OTUs in the BONCAT+ fraction did  
258 not result from them overgrowing the community during the incubation. Soil microbiomes are typically  
259 highly diverse and composed of largely uncultivated lineages<sup>3</sup>. Our data suggests that at least in this case,  
260 cultivated microbes comprise a substantial portion of the active cells. Although unexpected, this  
261 observation aligns well with the recently published contribution from Delgado-Baquerizo *et al.* 2018<sup>35</sup>  
262 that identified a list of 511 phylotypes (OTUs with 97% cutoff) encompassing 44% of the microbial  
263 diversity of soils worldwide. Among these phylotypes, 45% had a cultured representative, suggesting that  
264 only a small number of microbial phylotypes might be globally relevant for soil microbiomes, and that  
265 cultivation efforts have already yielded to isolate representatives of a substantial amount. In order to  
266 further compare our dataset with these 511 ubiquitous soil phylotypes, we ran BLAST on a set of  
267 representative sequences of our libraries OTUs and recovered the >97% hits (Figure 4A and 4B). We  
268 found that there was an overlap between the sequences found in the ENIGMA culture collection and from



269 the 511 reference phylotypes. Three of the most abundant BONCAT+ OTUs retrieved belonged to the  
270 511 prominent members of the global atlas for soil microbiome<sup>35</sup> (e.g. OTU g, h, i Figure 3).

271

## 272 **Exploring the link between abundance and activity in soils**

273 Most if not all structures of microbial communities follow a power low rank-abundance trend  
274 with a few highly abundant members, and a large number of rare members, which we also see for our data  
275 (Fig 2B). In order to persist in a community, all members should have a positive growth over death  
276 population ratio. However, in order to become abundant, a particular member must have higher growth  
277 rates and/or lower mortality rates than other members. Therefore, the makeup of the total community is an  
278 integration over time of microbial populations' turnover. It was proposed that dormant microbes play an  
279 important role in maintaining microbial diversity, acting as a "seed bank" where different OTUs become  
280 active under favorable conditions<sup>29</sup>. As a corollary it is thought that most activity is concentrated in  
281 hotspots with high organic input such as the rhizosphere<sup>44</sup>. Our data suggest that under a given set of  
282 conditions, only a small subset of the soil microbiome OTUs are active (88 OTUs on average in this  
283 study, Table S1), however these account for a large part of the cell population (20 % - 60 %) even in areas  
284 of soils that likely are not hotspots.

285 Despite dramatic differences in their initial abundance, a subset of consistently active cells is  
286 present across samples (e.g. OTUs e, f, h in Figure 3). This last observation is reminiscent of the "scout"  
287 model<sup>45</sup>: In this model, most cells are not actively growing, and 'scout' cells randomly "awaken" and  
288 start to divide if the resource conditions are favorable to do so. If the "scout" model holds true, one would  
289 indeed expect that under a given set of incubation conditions (as provided here), only a small fraction of  
290 the microbial diversity would wake up and an even smaller one would be able to thrive. We see examples  
291 of OTUs that appear to follow this 'awakening' behavior: for example, OTU h (Figure 3) was at very low  
292 abundance at 30 cm, and 48 h became the most abundant OTU in the BONCAT+ fraction after 48 h. As a  
293 corollary of the 'scout' model, because of spontaneous awakening, it is expected that active and inactive  
294 cells coexist for a given species, a prediction that is also verified by our data (e.g. OTU b and d Figure 3).  
295 These observations are also consistent with previous studies that have identified that even non-sporulating  
296 bacteria exhibit periods of transient dormancy<sup>46,47</sup> and that bacterial signaling molecules exist that  
297 promote cell resuscitation<sup>48,49</sup> whose could explain why only certain population become active.

298

## 299 **Conclusions**

300 We find BONCAT to be a useful tool for analysis of the active fraction of soil microbiomes when  
301 coupled to fluorescence activated single cell sorting (FACS) and sequencing. BONCAT enables  
302 separating active cells from free DNA, dormant microbes and physiologically impaired cells. It can be

303 viewed as a filter that focuses environmental DNA analyses on the active and likely ecologically relevant  
304 cell fraction in a given environmental condition. As all filters, the BONCAT procedure also introduces  
305 biases and will need to be benchmarked against other activity probing strategies. Nonetheless, we showed  
306 that BONCAT-FACS-Seq can be used to track the active cell population dynamics and dissect the  
307 behavior of active members at the phylum or OTU level. Our experiments resulted in consistent  
308 enrichment of a specific set of organisms in the BONCAT+ fraction that differs from the total  
309 community. Surprisingly, we found that a large fraction of the cells was active under our incubation  
310 conditions (25 % - 70 %), which contradicts the common view that most soil organisms are inactive  
311 (Figure 5). Overall, our data shows that the application of BONCAT-FACS-Seq is a powerful approach  
312 that can provide important new insights into soil microbiomes with the potential to help reconcile  
313 functional measurement to microbial diversity. Given these encouraging results and the relative simplicity  
314 of the approach we predict that it is going to be widely used in future applied and fundamental soil  
315 microbiome research.

316

## 317 **Material and methods**

318

### 319 **Samples collection and incubation condition**

320 Two 4 cm diameter sample soil cores were collected horizontally from Oak Ridge, TN (GPS  
321 35.941133, -84.336504) on January 24th 2017 from a silt loam area. A vertical trench was made and  
322 a first core was taken at 30 cm depth while the second one was collected at 76 cm depth. Both cores were  
323 shipped cooled and where stored in the dark at 4°C until processing. At the time of the experiment (within  
324 1-3 months after collection) a piece of ~1 g of soil was sampled from the distal part of the core under  
325 sterile conditions for each replicate and placed into a 10 ml culture tube, the full design can be found in  
326 Figure S1. Each replicate was incubated with 2 ml of 50 µM L-Homopropargylglycine (HPG, Click  
327 Chemistry Tools, Scottsdale, AZ, USA) in sterile water at 15°C in the dark. This temperature was chosen  
328 because it is the average surface temperature at the field site. At the end of the incubation period  
329 (spanning 0.5 h to 168 h, see Fig. Figure S1) 5 ml of 0.02% Tween® 20 (Sigma-Aldrich, ST Louis, MO,  
330 USA) in phosphate saline buffer (1X PBS) was added to each tube and further vortexed at maximum  
331 speed for 5 min (Vortex-Genie 2, Scientific Industries, Inc., Bohemia, NY, USA) in order to detach cells  
332 from the soil particles. Culture tubes were then centrifuged at 500 g for 55 min (centrifuge 5810R,  
333 Eppendorf, Hamburg, Germany) and the supernatant was frozen at -20°C in 10% glycerol (Sigma-  
334 Aldrich, ST Louis, MO, USA) until further processing.

335

### 336 **Killed control experiment**

337 We performed a killed control experiment to validate the active incorporation of HPG by the  
338 cells; every condition was tested for a biological duplicate. Samples from the 76 cm were either fixed  
339 with 3 % paraformaldehyde (PFA, Sigma-Aldrich, ST Louis MO, USA) incubated for 1 h at RT prior or  
340 after incubation with HPG. These samples were compared to no HPG control (with and without PFA) and  
341 non-fixed samples. Incubation times were 2 h and 48 h. This set of sample was handled as previously  
342 described, cells were detached from the soil and frozen stock in 10 % glycerol were kept at -20 °C until  
343 further evaluation of HPG incorporation, see below.

344

### 345 **Soil properties, mineral and organic composition of the soils**

346 Bulk X-ray powder diffraction was used to analyze the mineralogical composition of the soils  
347 cores. Powdered samples were loaded on an autosampler in a Rigaku SmartLab X-ray diffractometer  
348 (Rigaku, The Woodlands, TX, USA), using a Bragg-Brentano geometry in a theta-theta configuration.  
349 Data were collected from 4° to 70° of 2 $\theta$ , using Cu K $\alpha$  radiation. After manual identification of the phases  
350 present, a Rietveld refinement was performed to obtain their weight fractions, using the software  
351 MAUD<sup>50</sup>.

352

### 353 **Click reaction - BONCAT stain**

354 A volume of 700  $\mu$ l of frozen cells of each sample were allowed to thaw at 4°C for ~1 h h. In the  
355 meantime, the click-reaction mixture was prepared by mixing the dye premix with the reaction buffer.  
356 This premix consisted of 5  $\mu$ l copper sulfate (CuSO<sub>4</sub> 100  $\mu$ M final concentration), of 10  $\mu$ l tris-  
357 hydroxypropyltriazolylmethylamine (THPTA, 500  $\mu$ M final concentration), and of 3.3  $\mu$ l (FAM picolyl  
358 azide dye, 5  $\mu$ M final concentration). The mix was incubated 3 min in the dark before being mixed with  
359 the reaction buffer, which was made of 50  $\mu$ l sodium ascorbate freshly prepared in 1X PBS at 5 mM final  
360 concentration and 50  $\mu$ l of aminoguanidine HCl freshly prepared in 1X PBS at 5 mM final concentration  
361 and 880  $\mu$ l of 1X PBS. All reagents were purchased from Click Chemistry Tools (Click Chemistry Tools,  
362 Scottsdale, AZ, USA). Once thawed, the cells were captured on a 0.2  $\mu$ m GTTP isopore™ 25 mm  
363 diameter filter (MilliporeSigma, Burlington, MA, USA) and rinsed with 7 ml 1X PBS. The filter was then  
364 placed on a glass slide and 80  $\mu$ l of the click reaction mixture was quickly added before covering the filter  
365 with a coverslip to avoid excess oxygen during the click reaction. The slides were incubated in the dark  
366 for 30 min and each filter was then thoroughly washed three times in a succession of three baths of 20 ml  
367 1X PBS for 5 min each. The filters were finally transferred to 5 ml tubes (BD-Falcon 5 ml round bottom  
368 tube with snap cap, Corning™, Corning, NY, USA) with 2 ml of 0.02% Tween® 20 in PBS, with the cells  
369 facing inwards and vortexed at maximum speed for 5 min to detach the cells. The tubes were incubated  
370 for 20 min at 25°C, and subsequently stored at 4°C. Before being loaded onto the cell sorter (BD-

371 Influx<sup>TM</sup>, BD Biosciences, San Jose, CA, USA), the samples were filtered through a 35 µm filter (BD-  
372 falcon 5ml tube with cell strainer cap, Corning<sup>TM</sup>, Corning, NY, USA). A water incubated sample was  
373 clicked along with each set of samples to define the BONCAT staining background of each single click  
374 reaction.

375

### 376 **Flow cytometer, cell count and cell sorting**

377 For the cell counts, the cells were prepared the exact same way as described above, but the click  
378 reaction was omitted and the cells detached from the filter were stained 1X SYBR<sup>TM</sup> (ThermoFisher  
379 Scientific, Invitrogen, Eugene OR, USA). For the evaluation of the BONCAT stained samples, cells were  
380 counterstained with the SYTO<sup>TM</sup> 59 (ThermoFisher Scientific, Invitrogen, Eugene OR, USA) DNA dye  
381 for 5 min at RT at 0.5 µM. The cell sorter (BD-Influx<sup>TM</sup>, BD Biosciences, San Jose, CA, USA) was setup  
382 to capture the FAM picolyl azide dye (excitation = 490 nm/ emission = 510 nm) in the green channel off a  
383 488nm blue laser and the counter DNA stain (excitation = 622 nm, emission = 645 nm) in the red channel  
384 off of a 630 nm red laser. A first gate was drawn on the SYTO positive (SYTO+) particles, under the  
385 assumption that this would capture the cells. SYTO + events accounted for 0.1 - 5 % of the events  
386 depending on the samples, most of the events being abiotic, most probably clays or other minerals. The  
387 BONCAT positive (BONCAT +) and BONCAT negative (BONCAT -) were further gated as a sub-  
388 fraction of the SYTO+ cells based on the BONCAT dye fluorescence. The water incubated sample was  
389 used as a negative control to define the level of nonspecific BONCAT stain fluorescence, the BONCAT -  
390 gate was drawn under that line and BONCAT + gate was such that <0.5% of negative control cells were  
391 in it. The percent of BONCAT + determined for a timecourse for both the 30 cm and the 76 cm sample  
392 and guided the sorting decisions. We decided to sort three biological replicates at two incubation time  
393 points for the 76 cm sample (2h and 48h) and three biological replicates at one time point for the 30 cm  
394 sample (48h). A total of 35k-75k cells (see table Figure 1B for detailed counts) were sorted in parallel for  
395 the BONCAT + and BONCAT - gates into a 96 well plate. Plates were frozen at -80°C until processing.

396

### 397 **Total DNA extraction from soil and filters**

398 In order to compare sorted cells to the soil microbiome, total purified DNA was prepared from  
399 the soil cores and the cells captured on a 0.2 GTTP isopore<sup>TM</sup> 25 mm filter (MilliporeSigma, Burlington,  
400 MA, USA), respectively to account for the bias of the first step of the BONCAT process. We used the  
401 Qiagen-MoBio Power soil DNA kit (Qiagen, Hilden, Germany) following the manufacturer instructions,  
402 except for the lysis step that was performed by shaking the tubes at 30 Hz for 10 min in a tissue  
403 homogenizer (TissueLyser II, Qiagen, Hilden, Germany).

404

## 405 **Libraries preparation and sequencing**

406 In order to pellet the sorted cells, the 96 well plates were centrifuged at 7200 x g for 60 min at  
407 10°C. The plates were further centrifuged upside-down for 20 s at 60 x g to remove supernatant. The  
408 pelleted cells were lysed using PrepGEM (zyGEM, Charlottesville, VA, USA) chemical lysis in 2 µl  
409 reactions following manufacturer's recommendation. 0.2 µl of 10X Green buffer, 0.02 µl of PrepGEM,  
410 0.02 µl of lysozyme and 1.8 µl of water were added to each well. Note that six empty wells were  
411 submitted to PrepGEM lysis and library construction to account for potential contaminant. The plates  
412 were then placed in a thermocycler for 30 min at 37°C and 30 min at 75°C. The iTag PCR was performed  
413 directly on the cell lysate following the JGI standard operating protocol ([https://jgi.doe.gov/user-program-](https://jgi.doe.gov/user-program-info/pmo-overview/protocols-sample-preparation-information/)  
414 [info/pmo-overview/protocols-sample-preparation-information/](https://jgi.doe.gov/user-program-info/pmo-overview/protocols-sample-preparation-information/)). Briefly, the V4 region of the 16S  
415 rDNA was amplified using the universal primer set 515F (GTGYCAGCMGCCGCGGTAA), 806R  
416 (GGACTACNVGGGTWTCTAAT). The adapter sequences, linkers and barcode were on the reverse  
417 primer. The 16S PCR was performed in a final volume of 25 µl (10 µl of the 5 Prime master mix, 0.5 µl  
418 of the forward primer (at 10 µM), 1.5 µl of the reverse primer (at 3.3 µM), 0.44 µl of BSA, 10.5 µl of  
419 water and 2 µl of cell lysate). The PCR condition was as follows: after an initial denaturation step at 94°C  
420 for 3 min, 30 PCR cycles occurred consisting on a 45 sec denaturation step at 94°C followed by  
421 a 1 min annealing step at 50°C and a 1.5 min elongation step at 72°C. A final elongation step of 10 min at  
422 72°C was further added to finish all incomplete target sequences. The V4 region of the 16S rDNA from  
423 the total DNA extracted from the soil and from the cells enriched on filters were also amplified using the  
424 same PCR condition. The PCR products were cleaned using the Agencourt AMPure XP beads solution  
425 (Beckman Coulter Life Sciences, Indianapolis, IN, USA) to remove excess primers and primer dimers.  
426 PCR products were incubated with 80% (v/v) beads for 5 min at 25 °C before being placed on a magnetic  
427 holder (MagWell™ Magnetic Separator 96, EdgeBio, San Jose, CA, USA). The supernatant was removed  
428 and the beads were washed with 70% v/v ethanol three times before being resuspended in 11 µl of water.  
429 The total DNA extracts were processed in parallel, the only difference being that the iTag PCR was  
430 performed in 50 µl final volume and the PCR product was resuspended in 16 µl water after the bead  
431 clean-up step. PCR products were run on a High Sensitivity DNA assay Bioanalyzer chip (2100  
432 Bioanalyser, Agilent, Santa Clara, CA, USA) to confirm fragment size and concentration. PCR products  
433 were pooled to an equimolar concentration and run on the Illumina MiSeq platform (Illumina, San Diego,  
434 CA, USA). Sequences data have been archived under the Bioproject ID PRJNA475109 at the NCBI.

435

## 436 **Sequences processing**

437 The sequences were processed using qiime2 v2017.9. The sequences had been demultiplexed by  
438 the JGI sequencing platform, after being deinterleaved, they being were imported in qiime2 using the

439 *fastq manifest* format. Sequences were further denoised, the primer trimmed (20 nucleotides from each  
440 side) and paired using DADA2<sup>51</sup>, as implemented in the qiime *dada2 denoise-paired* plug-in. This step  
441 also included a chimera check using the *consensus* method. The output was a table of 4'063 exact  
442 sequence variants (ESVs) of 6'419'059 sequences. 130 ESVs had at least one hit in one of the six no  
443 template controls and were not considered for further analysis. The filtered table had 6'110'776  
444 sequences gathered into 3'933 ESVs, and the median value was 205'167 sequences per sample. The  
445 ESVs were further clustered into operational taxonomic units (OTU) at a threshold of 97% similarity  
446 using the *vsearch cluster-features-de-novo* plug-in. The clustered OTU table had 1'533 OTUs in total.  
447 The absolute number of OTUs can vary by up to three orders of magnitude depending on the technique  
448 used<sup>52</sup>, DADA2 is known to return a more conservative number than the previously widely used upfront  
449 clustering methods by decreasing the number of false positives<sup>51</sup>. This relatively low number is also  
450 consistent with the very low level of organics (carbon and nitrogen) in these soils, which total organic  
451 carbon? (TOC) are comparable to un-colonized arid lands where microbial diversity is reduced<sup>53</sup>. The  
452 taxonomy of the representative sequences was assigned using the *feature-classifier classify-sklearn* plug-  
453 in (<https://data.qiime2.org/2018.2/common/gg-13-8-99-515-806-nb-classifier.qza>). This classifier was  
454 trained on the Greengenes database 13\_8 99% trimmed to the amplified region (V4 515F/806R). If the  
455 classifier could not assign the representative sequences at the phylum, then they were manually checked  
456 on the most up-to-date Silva SINA alignment service (<https://www.arb-silva.de/aligner/>) and the Silva  
457 classification was retained. The OTU table with assigned taxonomy was used to build the bar graph at the  
458 phylum level and all downstream analyses. Bray Curtis pairwise distance beta-diversity metric was  
459 computed on the OTU table and the obtained triangular distance matrix was ordinated using NMDS.

460

#### 461 **Comparison with reference dataset**

462 We compared our iTag data with the 697 full-length 16S rDNA of the ENIGMA Project's  
463 existing culture collection from this field site and with the 511 16S rDNA sequences of the most abundant  
464 and widespread soil microbiome members, retrieved from<sup>35</sup>. We performed a nucleotide BLAST of one  
465 representative sequence per ESV against the ENIGMA isolate database or the "511 most wanted soil  
466 phylotypes"<sup>35</sup> database using Geneious R9<sup>®</sup>. A cutoff of >97% similarity was used to determine if a  
467 sequence from our dataset had a match in the ENIGMA isolate database and/or the "511 most wanted soil  
468 phylotypes" database.

469

#### 470 **LC-MS Soil metabolomics – targeted analysis for soil methionine that may interfere with BONCAT**

471 Triplicates of 2 g of soils from 30 cm and 70 cm were extracted using 8 ml of LCMS grade water  
472 and incubated 1 h on an overhead shaker at 4°C. Aqueous extractable components were collected by



473 removal of insoluble material with centrifugation at 3220 g for 15 min at 4 °C, filtration of supernatants  
474 through a 0.45 µm PVDF syringe filter (MilliporeSigma, Burlington, MA, USA), followed by  
475 lyophilization of filtrates to remove water (Labconco 7670521, Kansas City, MO, USA). Dried samples  
476 were then resuspended in 500 µl of LCMS grade methanol, bath sonicated at 25 °C for 15 min, and then  
477 clarified by filtration through 0.2 µm PVDF microcentrifugal filtration devices (1000 g, 2 min, 25 °C).  
478 Methanol extracts were spiked with an internal standard mix (<sup>13</sup>C, <sup>15</sup>N universally labeled amino acids,  
479 767964, Sigma-Aldrich, USA, which included standard amino acids, including methionine, at a final  
480 concentration of 10 µM). Metabolites in extracts were chromatographically separated using hydrophilic  
481 liquid interaction chromatography on a SeQuant 5 µm, 150 x 2.1 mm, 200 Å zic-HILIC column  
482 (1.50454.0001, Millipore) and detected with a Q Exactive Hybrid Quadrupole-Orbitrap Mass  
483 Spectrometer equipped with a HESI-II source probe (ThermoFisher Scientific). Chromatographic  
484 separations were done by an Agilent 1290 series HPLC system, used with a column temperature at 40 °C,  
485 sample storage was set at 4 °C and injection volume at 6 µl. A gradient of mobile phase A (5 mM  
486 ammonium acetate in water) and B (5 mM ammonium acetate, 95% v/v acetonitrile in water) was used  
487 for metabolite retention and elution as follows: column equilibration at 0.45 mL 5ml min<sup>-1</sup> in 100% B  
488 for 1.5 min, followed by a linear gradient at 0.45 5ml min<sup>-1</sup> to 35% A over 13.5 min, a linear gradient to  
489 0.6 mL 5 ml min<sup>-1</sup> and to 100% A over 3 min, a hold at 0.6 6 5ml min<sup>-1</sup> and 100% A for 5 min followed  
490 by a linear gradient to 0.45 5ml min<sup>-1</sup> and 100% B over 2 min and re-equilibration for an additional 7 min.  
491 Each sample was injected twice: once for analysis in positive ion mode and once for analysis in negative  
492 ion mode. The mass spectrometer source was set with a sheath gas flow of 55, aux gas flow of 20 and  
493 sweep gas flow of 2 (arbitrary units), spray voltage of |±3| kV, and capillary temperature of 400 °C. Ions  
494 were detected by the Q Exactive's data dependent MS2 Top2 method, with the two highest abundance  
495 precursory ions (2.0 m/z isolation window, 17,500 resolution, 1e5 AGC target, 2.0 m/z isolation window,  
496 stepped normalized collisions energies of 10, 20 and 30 eV) selected from a full MS pre-scan (70-1050  
497 m/z, 70,000 resolution, 3e6 AGC target, 100 ms maximum ion transmission) with dd settings at 1e3  
498 minimum AGC target, charges excluded above |3| and a 10 s dynamic exclusion window. Internal and  
499 external standards were included for quality control purposes, with blank injections between every unique  
500 sample. QC mix was injected at the start and end of the injection sequence to ensure the stability of the  
501 signal through time and consisted of 30 compounds spanning a large range of m/z, RT and detectable in  
502 both positive and negative mode. Extracted ion chromatograms for internal standard compounds were  
503 evaluated using MZmine version 2.26<sup>54</sup> to ensure consistency between injections. Samples were analyzed  
504 using Metabolite Atlas<sup>54</sup> (<https://github.com/biorack/metatlas>). Briefly, a retention time corrected  
505 compound library generated by linear regression comparison of QC standards against an in house  
506 retention time (RT)-m/z-MSMS library of reference compounds analyzed using the same LCMS methods

507 was used for compound identification in samples where measured RT, m/z and fragmentation spectra  
508 were compared with library predicted RT, theoretical m/z, library detected adducts and library MSMS  
509 fragmentation spectra. Compounds identification were retained when peak intensity was  $> 1e4$ , retention  
510 time difference from predicted was  $< 1$  min, m/z was less than 20 ppm from theoretical, expected adduct  
511 was detected and at least 1 ion fragment matched the library spectra and were more abundant in at least  
512 one sample as compared to the average value + 1 SD of the extraction controls. Only 8 compounds  
513 met these criteria; average peak heights from the extracted ion chromatograms are reported in Figure S5.  
514 The signal was overall very low owing to the low amount of organics in these soils. We checked for the  
515 presence of methionine manually using MZmine version 2.26<sup>32</sup> and confirmed that there were no  
516 detectable of methionine in any of the sample analyzed. Metabolomics data has been deposited JGI  
517 genome portal #1207416 along with the analysis file #1207417.

518  
519

## 520 **Acknowledgment**

521 The authors would like to acknowledge Dominique Joyner for the samples collection and shipping, Marco  
522 Voltolini (LBNL) for his support in the X-Ray diffraction analyses, and the JGI sequencing group for its  
523 technical assistance. This work was funded by a discovery proposal awarded to T. Northen as part of the  
524 ENIGMA (Ecosystems and Networks Integrated with Genes and Molecular Assemblies  
525 <http://enigma.lbl.gov>) Scientific Focus Area Program at Lawrence Berkeley National Laboratory; the  
526 work conducted by the U.S. Department of Energy Joint Genome Institute, a DOE Office of Science User  
527 Facility, both supported by the Genomic Sciences Program, Office of Biological and Environmental  
528 Research, in the Office of Science of the U.S. Department of Energy under Contract No. DE-AC02-  
529 05CH11231.

530

## 531 **Reference**

- 532 1. Bardgett, R. D. & Van Der Putten, W. H. Belowground biodiversity and ecosystem functioning.  
533 *Nature* **515**, 505–511 (2014).
- 534 2. Torsvik, V. & Øvreås, Å. Microbial diversity and function in soil: from genes to ecosystems. *Curr.*  
535 *Op. Microbiol.* **5**, 240–245 (2002).
- 536 3. Fierer, N. Embracing the unknown: Disentangling the complexities of the soil microbiome. *Nat.*  
537 *Rev. Microbiol.* **15**, 579–590 (2017).
- 538 4. Schloss, P. D. & Handelsman, J. Toward a census of bacteria in soil. *PLoS Comput. Biol.* **2**, 0786–  
539 0793 (2006).
- 540 5. Fierer, N., Bradford, M. A. & Jackson, R. B. Toward an ecological classification of soil bacteria.

- 541 *Ecology* **88**, 1354–1364 (2007).
- 542 6. Ramirez, K. S. *et al.* Detecting macroecological patterns in bacterial communities across  
543 independent studies of global soils. *Nat. Microbiol.* **3**, 1–8 (2017).
- 544 7. Fierer, N. & Jackson, R. The diversity and biogeography of soil bacterial communities. *Proc. Natl.*  
545 *Acad. Sci.* **103**, 626–631 (2006).
- 546 8. Crowther, T. W. *et al.* Predicting the responsiveness of soil biodiversity to deforestation: A cross-  
547 biome study. *Glob. Chang. Biol.* **20**, 2983–2994 (2014).
- 548 9. Serna-Chavez, H. M., Fierer, N. & Van Bodegom, P. M. Global drivers and patterns of microbial  
549 abundance in soil. *Glob. Ecol. Biogeogr.* **22**, 1162–1172 (2013).
- 550 10. Barberán, A., Bates, S. T., Casamayor, E. O. & Fierer, N. Using network analysis to explore co-  
551 occurrence patterns in soil microbial communities. *ISME J.* **6**, 343–351 (2012).
- 552 11. Baveye, P. C. *et al.* Emergent properties of microbial activity in heterogeneous soil  
553 microenvironments: Different research approaches are slowly converging, yet major challenges  
554 remain. *Front. Microbiol.* **in press**, (2018).
- 555 12. Kirschbaum, M. U. F. The temperature dependence of organic-matter decomposition - Still a topic  
556 of debate. *Soil Biol. Biochem.* **38**, 2510–2518 (2006).
- 557 13. Carini, P. *et al.* Relic DNA is abundant in soil and obscures estimates of soil microbial diversity.  
558 *Nat. Microbiol.* **2**, 1–6 (2016).
- 559 14. Blagodatskaya, E. & Kuzyakov, Y. Active microorganisms in soil: Critical review of estimation  
560 criteria and approaches. *Soil Biol. Biochem.* **67**, 192–211 (2013).
- 561 15. Wanzek, T. *et al.* Quantifying biogeochemical heterogeneity in soil systems. *Geoderma* **324**, 89–  
562 97 (2018).
- 563 16. Singer, E., Wagner, M. & Woyke, T. Capturing the genetic makeup of the active microbiome in  
564 situ. *ISME J.* **11**, 1949–1963 (2017).
- 565 17. Neufeld, J. D. *et al.* DNA stable-isotope probing. *Nat. Protoc.* **2**, 860–866 (2007).
- 566 18. Pett-Ridge, J. & Firestone, M. K. Using stable isotopes to explore root-microbe-mineral  
567 interactions in soil. *Rhizosphere* **3**, 244–253 (2017).
- 568 19. Y. Verastegui, J. Cheng, K. E. Multisubstrate Isotope Labeling and Metagenomic Analysis of  
569 Active Soil Bacterial Communities. *MBio* **5**, 1–12 (2014).
- 570 20. Rettedal, E. A. & Brözel, V. S. Characterizing the diversity of active bacteria in soil by  
571 comprehensive stable isotope probing of DNA and RNA with H<sub>2</sub><sup>18</sup>O. *Microbiologyopen* **4**, 208–  
572 219 (2015).
- 573 21. Artursson, V. & Jansson, J. K. Use of Bromodeoxyuridine Immunocapture To Identify Active  
574 Bacteria Associated with Arbuscular Mycorrhizal Hyphae. *Society* **69**, 6208–6215 (2003).

- 575 22. David, M. M. *et al.* Microbial ecology of chlorinated solvent biodegradation. *Environ. Microbiol.*  
576 **17**, 4835–4850 (2015).
- 577 23. Bravo, D. *et al.* Identification of active oxalotrophic bacteria by Bromodeoxyuridine DNA  
578 labeling in a microcosm soil experiments. *FEMS Microbiol. Lett.* **348**, 103–111 (2013).
- 579 24. Blagodatskaya, E. & Kuzyakov, Y. Active microorganisms in soil: Critical review of estimation  
580 criteria and approaches. *Soil Biol. Biochem.* **67**, 192–211 (2013).
- 581 25. Raynaud, X. & Nunan, N. Spatial ecology of bacteria at the microscale in soil. *PLoS One* **9**,  
582 (2014).
- 583 26. Schimel, J. P. & Schaeffer, S. M. Microbial control over carbon cycling in soil. *Front. Microbiol.*  
584 **3**, 1–11 (2012).
- 585 27. Bond-Lamberty, B., Bailey, V. L., Chen, M., Gough, C. M. & Vargas, R. Globally rising soil  
586 heterotrophic respiration over recent decades. *Nature* **560**, 80–83 (2018).
- 587 28. Placella, S. A., Brodie, E. L. & Firestone, M. K. Rainfall-induced carbon dioxide pulses result  
588 from sequential resuscitation of phylogenetically clustered microbial groups. *Proc. Natl. Acad.*  
589 *Sci.* **109**, 10931–10936 (2012).
- 590 29. Jones, S. E. & Lennon, J. T. Dormancy contributes to the maintenance of microbial diversity.  
591 *Proc. Natl. Acad. Sci.* **107**, 5881–5886 (2010).
- 592 30. Hatzenpichler, R. & Orphan, V. J. in *Hydrocarbon and Lipid Microbiology Protocols - Springer*  
593 *Protocols Handbooks* 1–29 (2015). doi:10.1007/8623
- 594 31. Hatzenpichler, R. *et al.* In situ visualization of newly synthesized proteins in environmental  
595 microbes using amino acid tagging and click chemistry. *Environ. Microbiol.* **16**, 2568–2590  
596 (2014).
- 597 32. Dieterich, D. C., Link, A. J., Graumann, J., Tirrell, D. A. & Schuman, E. M. Selective  
598 identification of newly synthesized proteins in mammalian cells using bioorthogonal noncanonical  
599 amino acid tagging (BONCAT). *Proc. Natl. Acad. Sci. U. S. A.* **103**, 9482–7 (2006).
- 600 33. Glenn, W. S. *et al.* Bioorthogonal Noncanonical Amino Acid Tagging (BONCAT) Enables Time-  
601 Resolved Analysis of Protein Synthesis in Native Plant Tissue. *Plant Physiol.* **173**, 1543–1553  
602 (2017).
- 603 34. Hatzenpichler, R. *et al.* Visualizing in situ translational activity for identifying and sorting slow-  
604 growing archaeal–bacterial consortia. *Proc. Natl. Acad. Sci.* **113**, E4069–E4078 (2016).
- 605 35. Delgado-baquerizo, M. *et al.* A global atlas of the dominant bacteria in soil. *Science (80-. )*. **325**,  
606 320–325 (2018).
- 607 36. Hug, L. A. *et al.* A new view of the tree and life’s diversity. Manuscript submitted for publication  
608 (2016). doi:10.1038/nmicrobiol.2016.48

- 609 37. Nannipieri, P., Johnson, R. L. & Paul, E. A. Criteria for measurement of microbial growth and  
610 activity in soil. *Soil Biol. Biochem.* **10**, 223–229 (1978).
- 611 38. Liang, C., Schimel, J. P. & Jastrow, J. D. The importance of anabolism in microbial control over  
612 soil carbon storage. *Nat. Microbiol.* **2**, 17105 (2017).
- 613 39. Vos, M., Wolf, A. B., Jennings, S. J. & Kowalchuk, G. A. Micro-scale determinants of bacterial  
614 diversity in soil. *FEMS Microbiol. Rev.* **37**, 936–954 (2013).
- 615 40. Nunan, N., Wu, K., Young, I. M., Crawford, J. W. & Ritz, K. Spatial distribution of bacterial  
616 communities and their relationships with the micro-architecture of soil. *FEMS Microbiol. Ecol.* **44**,  
617 203–215 (2003).
- 618 41. Martin-Laurent, F. *et al.* DNA Extraction from Soils: Old Bias for New Microbial Diversity  
619 Analysis Methods. *Appl. Environ. Microbiol.* **67**, 2354–2359 (2001).
- 620 42. Hansen, M. C., Tolker-Nielsen, T., Givskov, M. & Molin, S. Biased 16S rDNA PCR amplification  
621 caused by interference from DNA flanking the template region. *FEMS Microbiol. Ecol.* **26**, 141–  
622 149 (1998).
- 623 43. Ji, M. *et al.* Atmospheric trace gases support primary production in Antarctic desert surface soil.  
624 *Nature* **552**, 400–403 (2017).
- 625 44. Kuzyakov, Y. & Blagodatskaya, E. Microbial hotspots and hot moments in soil: Concept &  
626 review. *Soil Biol. Biochem.* **83**, 184–199 (2015).
- 627 45. Epstein, S. S. Microbial awakenings. *Nature* **457**, 1083 (2009).
- 628 46. Kaprelyants, A. S., Mukamolova, G. V. & Kell, D. B. Estimation of dormant *Micrococcus luteus*  
629 cells by penicillin lysis and by resuscitation in cell-free spent culture medium at high dilution.  
630 *FEMS Microbiol. Lett.* **115**, 347–352 (1994).
- 631 47. Kaprelyants, A. S., Gottschal, J. C. & Kell, D. B. Dormancy in non-sporulating bacteria. *FEMS*  
632 *Microbiol. Rev.* **104**, 271–286 (1993).
- 633 48. Kaprelyants, A. S. & Kell, D. B. Do bacteria need to communicate with each other for growth?  
634 *Trends Microbiol.* **4**, 237–242 (1996).
- 635 49. Mukamolova, G. V., Kaprelyants, A. S., Young, D. I., Young, M. & Kell, D. B. A bacterial  
636 cytokine. *Proc. Natl. Acad. Sci. U. S. A.* **95**, 8916–8921 (1998).
- 637 50. Lutterotti, L., Matthies, S. & Wenk, H. MAUD: a friendly Java program for material analysis  
638 using diffraction. *CPD Newsl.* **21**, 14–15 (1999).
- 639 51. Callahan, B. J. *et al.* DADA2: High resolution sample inference from amplicon data. *bioRxiv* **13**,  
640 0–14 (2015).
- 641 52. Flynn, J. M., Brown, E. A., Chain, F. J. J., MacIsaac, H. J. & Cristescu, M. E. Toward accurate  
642 molecular identification of species in complex environmental samples: testing the performance of

- 643 sequence filtering and clustering methods. *Ecol. Evol.* **5**, 2252–2266 (2015).
- 644 53. Bowker, M. a., Maestre, F. T. & Escolar, C. Biological crusts as a model system for examining the  
645 biodiversity–ecosystem function relationship in soils. *Soil Biol. Biochem.* **42**, 405–417 (2010).
- 646 54. Yao, Y. *et al.* Analysis of metabolomics datasets with high-performance computing and metabolite  
647 atlases. *Metabolites* **5**, 431–442 (2015).
- 648
- 649



650 **Table S1:** Sample description, pooling strategy and alpha diversity metric of the iTag libraries

| Sample ID          | Sample depth | Incubation time | Type     | Number of cells pooled | Frequency* per sample before filtering contaminants | Frequency* per sample without contaminant | ESV count | OTU count (97% sim. cluster) |
|--------------------|--------------|-----------------|----------|------------------------|-----------------------------------------------------|-------------------------------------------|-----------|------------------------------|
| 30cm_48h_A_BONCAT+ | 30 cm        | 48h             | BONCAT + | 50000                  | 258672                                              | 257606                                    | 138       | 97                           |
| 30cm_48h_A_BONCAT- | 30 cm        | 48h             | BONCAT - | 75000                  | 140530                                              | 136389                                    | 77        | 51                           |
| 30cm_48h_B_BONCAT+ | 30 cm        | 48h             | BONCAT + | 75000                  | 236375                                              | 234877                                    | 203       | 144                          |
| 30cm_48h_B_BONCAT- | 30 cm        | 48h             | BONCAT - | 75000                  | 82431                                               | 81186                                     | 171       | 123                          |
| 30cm_48h_D_BONCAT+ | 30 cm        | 48h             | BONCAT + | 75000                  | 279152                                              | 278404                                    | 178       | 126                          |
| 30cm_48h_D_BONCAT- | 30 cm        | 48h             | BONCAT - | 75000                  | 155187                                              | 89480                                     | 139       | 105                          |
| 76cm_2h_A_BONCAT+  | 76 cm        | 2h              | BONCAT + | 35000                  | 163551                                              | 163183                                    | 194       | 131                          |
| 76cm_2h_A_BONCAT-  | 76 cm        | 2h              | BONCAT - | 50000                  | 122347                                              | 120373                                    | 74        | 53                           |
| 76cm_2h_B_BONCAT+  | 76 cm        | 2h              | BONCAT + | 65000                  | 240574                                              | 240285                                    | 199       | 143                          |
| 76cm_2h_B_BONCAT-  | 76 cm        | 2h              | BONCAT - | 75000                  | 154938                                              | 152259                                    | 55        | 42                           |
| 76cm_2h_C_BONCAT+  | 76 cm        | 2h              | BONCAT + | 73000                  | 149499                                              | 149499                                    | 268       | 187                          |
| 76cm_2h_C_BONCAT-  | 76 cm        | 2h              | BONCAT - | 75000                  | 115293                                              | 115293                                    | 166       | 109                          |
| 76cm_48h_A_BONCAT+ | 76 cm        | 48h             | BONCAT + | 75000                  | 736900                                              | 736231                                    | 161       | 129                          |
| 76cm_48h_A_BONCAT- | 76 cm        | 48h             | BONCAT - | 45000                  | 146726                                              | 130866                                    | 57        | 38                           |
| 76cm_48h_B_BONCAT+ | 76 cm        | 48h             | BONCAT + | 75000                  | 257443                                              | 257311                                    | 403       | 269                          |
| 76cm_48h_B_BONCAT- | 76 cm        | 48h             | BONCAT - | 35000                  | 127528                                              | 113817                                    | 126       | 87                           |
| 76cm_48h_C_BONCAT+ | 76 cm        | 48h             | BONCAT + | 50000                  | 484680                                              | 482851                                    | 613       | 441                          |
| 76cm_48h_C_BONCAT- | 76 cm        | 48h             | BONCAT - | 75000                  | 164342                                              | 160961                                    | 135       | 99                           |
| 76cm_A_filter      | 76 cm        | -               | FILTER   | -                      | 305866                                              | 305866                                    | 528       | 381                          |
| 76cm_B_filter      | 76 cm        | -               | FILTER   | -                      | 336054                                              | 336054                                    | 561       | 421                          |
| 76cm_C_filter      | 76 cm        | -               | FILTER   | -                      | 175457                                              | 175457                                    | 373       | 281                          |
| 30cm_A_filter      | 30 cm        | -               | FILTER   | -                      | 327415                                              | 327415                                    | 567       | 406                          |
| 30cm_B_filter      | 30 cm        | -               | FILTER   | -                      | 260298                                              | 260298                                    | 412       | 296                          |
| 30cm_C_filter      | 30 cm        | -               | FILTER   | -                      | 141273                                              | 141273                                    | 338       | 246                          |
| 76cm_total_soil    | 76 cm        | -               | SOIL     | -                      | 349341                                              | 349341                                    | 390       | 324                          |
| 30cm_total_soil    | 30 cm        | -               | SOIL     | -                      | 314201                                              | 314201                                    | 916       | 620                          |

651 \*Number of sequences after QC and denoising, note that DADA2 removed all singletons

652

653

654  
655  
656  
657  
658

**Figures**

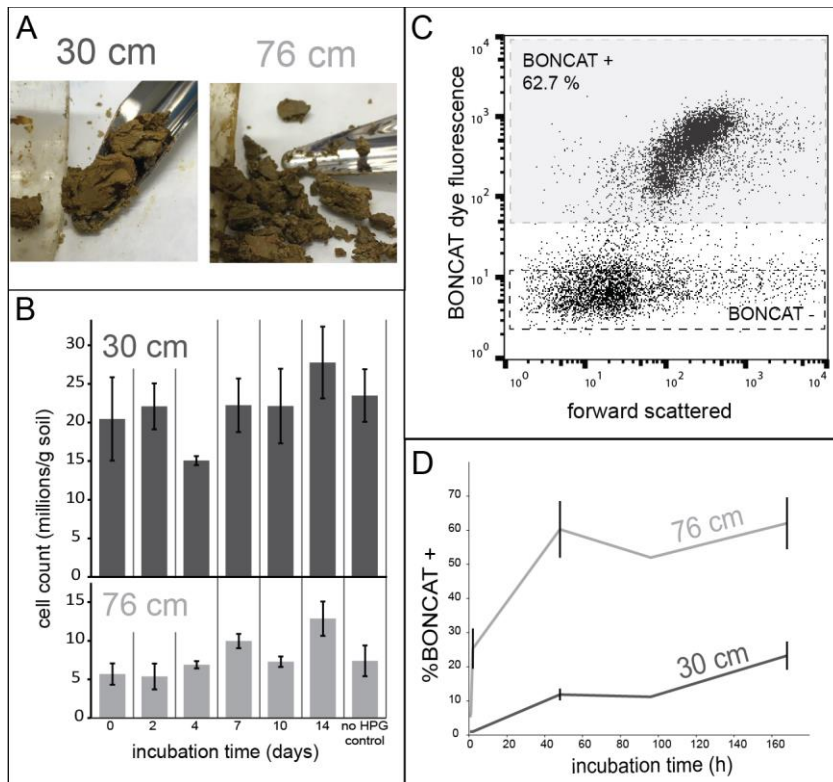

659  
660  
661  
662  
663  
664  
665  
666  
667

**Figure 1: Performing BONCAT-FACS-Seq on soil samples. (A)** Pictures of the 30 cm and 76 cm soils sampled from the horizontal cores. **(B)** Cell counts over time showing ~20 million cells per gram at 30 cm and ~5 million cells per gram at 76 cm. **(C)** Example of BONCAT+ cells as assessed by flow cytometry. Each dot represents a SYTO59 (DNA dye) positive signal, but only the top population (BONCAT +, grey box) incorporated HPG during incubations. **(D)** Temporal dynamics of BONCAT+ labeling for the 30 cm and the 76 cm sample. Error bars represent standard deviation (n=3).

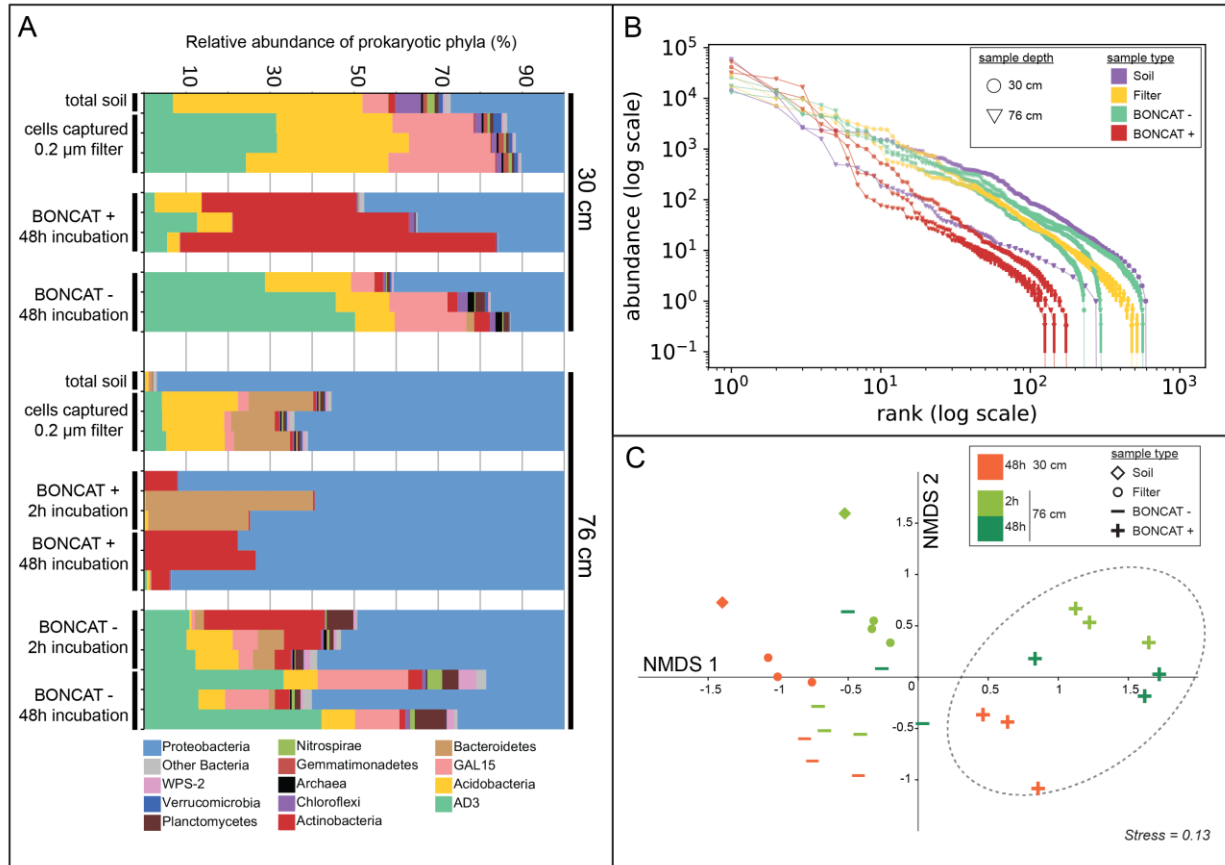

668

669 **Figure 2: Composition of total community and BONCAT+ cells determined by 16S sequencing. (A)**

670 Microbial diversity displayed at the phylum level for all samples analyzed. **(B)** Rank vs. abundance plot in

671 log-log scale of the libraries of averaged biological replicates, standard deviations are displayed as error

672 bars (n=3). **(C)** NMDS ordination of the Bray-Curtis pairwise distance of all libraries. 95% confidence

673 ellipse is displayed on the BONCAT+ group of samples. “Soil” samples are libraries constructed from

674 total DNA extracted from soil, “Filter” samples are DNA extracted from all cells detached from soil and

675 captured on a 0.2 μm filter, BONCAT+ and BONCAT- libraries were constructed from corresponding

676 cell sorted samples.

677

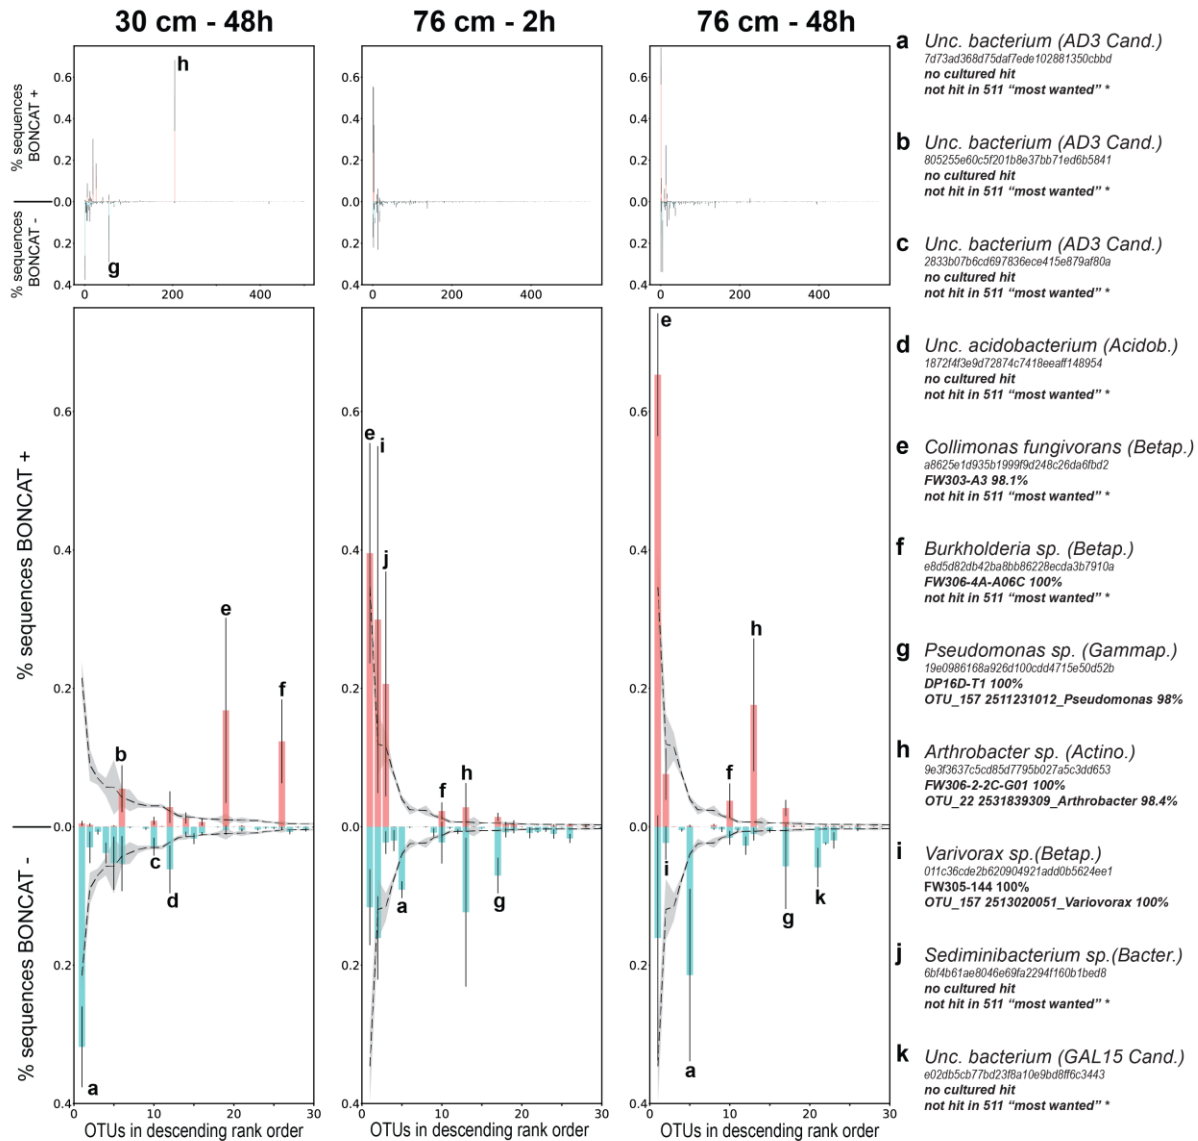

678

679 **Figure 3: Comparing the composition of the BONCAT+ and BONCAT – populations. (A)** Relative

680 abundance (in percent,  $\pm$ SD, n=3) of OTUs present in the BONCAT+ (red) and BONCAT – (blue) for the

681 30 cm - 48h incubation (left panel), 76 cm - 2 h incubation (middle panel) and 76cm - 48h incubation

682 (right panel). The OTUs have been ranked in descending order from left to right according to their

683 relative abundance on the filter samples (all cells detached and captured on a filter). **(B)** Close-up on the

684 30 most abundant OTUs overlaid with their abundance on the filter samples (dashed line,  $\pm$ SD shows as

685 gray shading). The most abundant OTUs are indexed from a to k. Their taxonomy, ID, hit in the

686 ENIGMA culture collection and matches to the 511 most abundant soil microbiome<sup>35</sup> is provided on the

687 right legend panel.

688

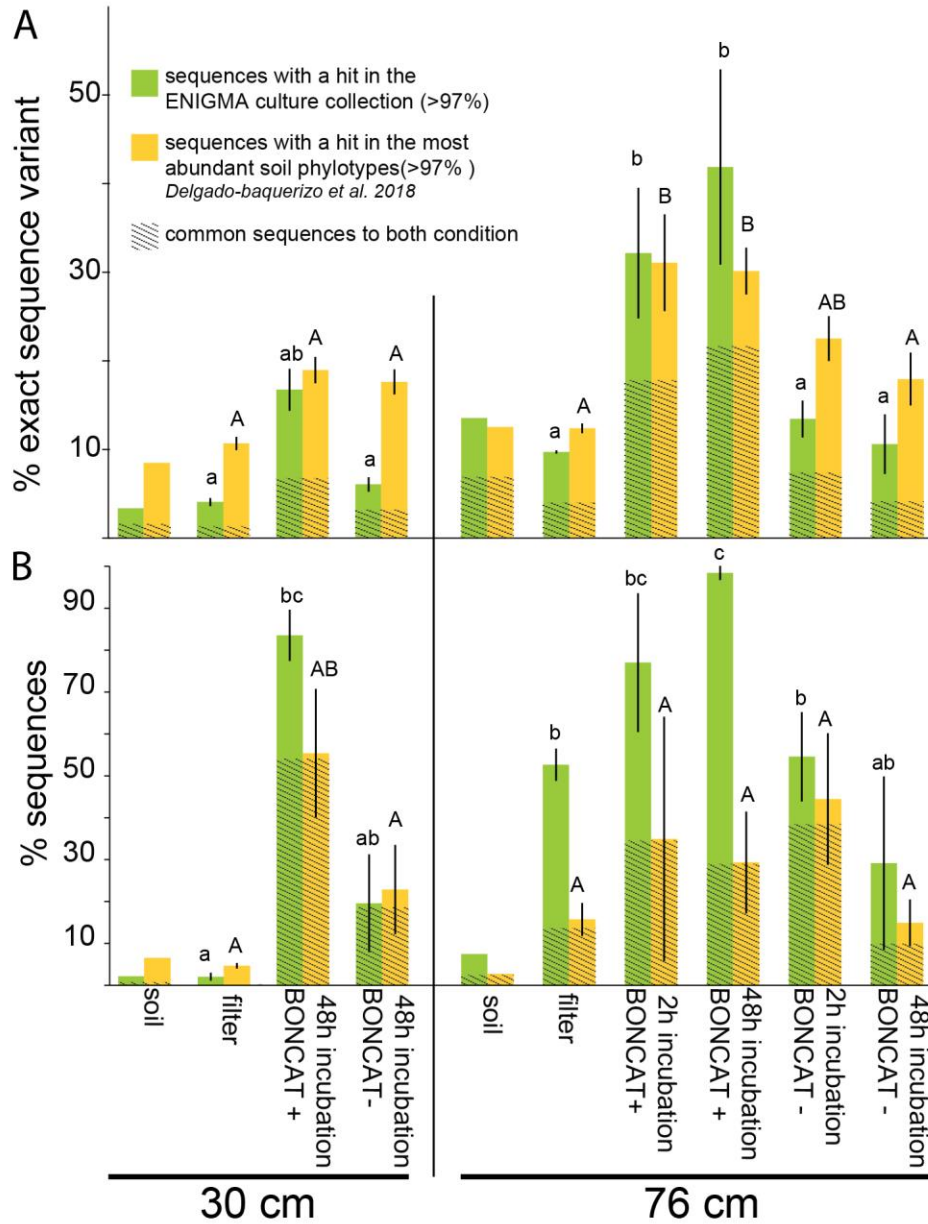

689

690 **Figure 4: Prevalence of soil isolates and ubiquitous soil OTUs among BONCAT+ cells. (A)** Percent  
 691 ESVs and **(B)** percent sequences from the current libraries with a hit (>97% sequence similarity) in the  
 692 ENIGMA culture collection (this collection contains 697 full-length 16S rDNA from strains that were  
 693 isolated from the same field site as the samples considered in this study) (green), in the set of 511  
 694 phylotypes identified as the most abundant by <sup>35</sup> (yellow) or both (dashed area). Data are average (n=3)  
 695 ±SD, letters indicate ANOVA post-hoc significant differences. “soil” samples are libraries constructed  
 696 from total DNA extracted from soil, “filter” samples are DNA extracted from all cells detached from soil  
 697 and captured on a 0.2 μm filter, BONCAT+ and BONCAT- libraries were constructed from  
 698 corresponding cell sorted samples.

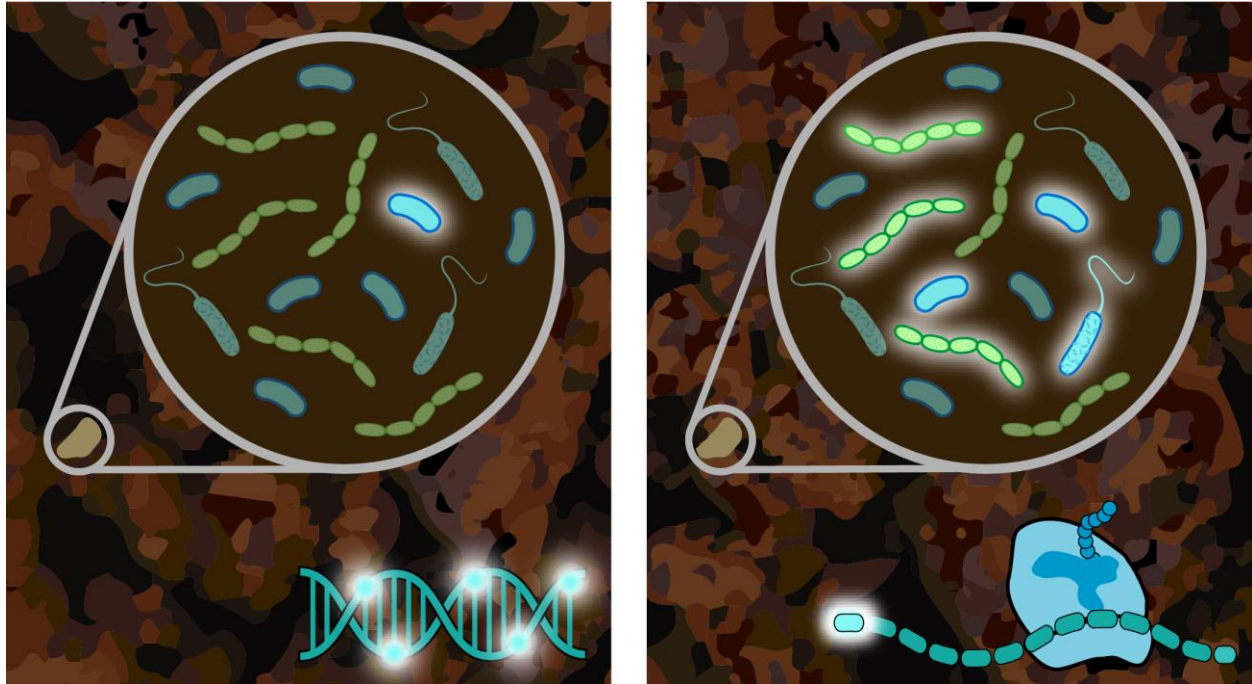

699

700 **Figure 5: The use of BONCAT is adding a large fraction of active microbe on the soil microbiome**  
701 **picture (Left panel) Traditional view, based on DNA labelling (right bottom corner) showing that 1.9 %**  
702 **of cells on average are active in soils<sup>24</sup>, (Right panel) By labeling proteins (right bottom corner) we find a**  
703 **large fraction (up to 70%) of the cells can be active at once *in situ* in our soil samples.**



704

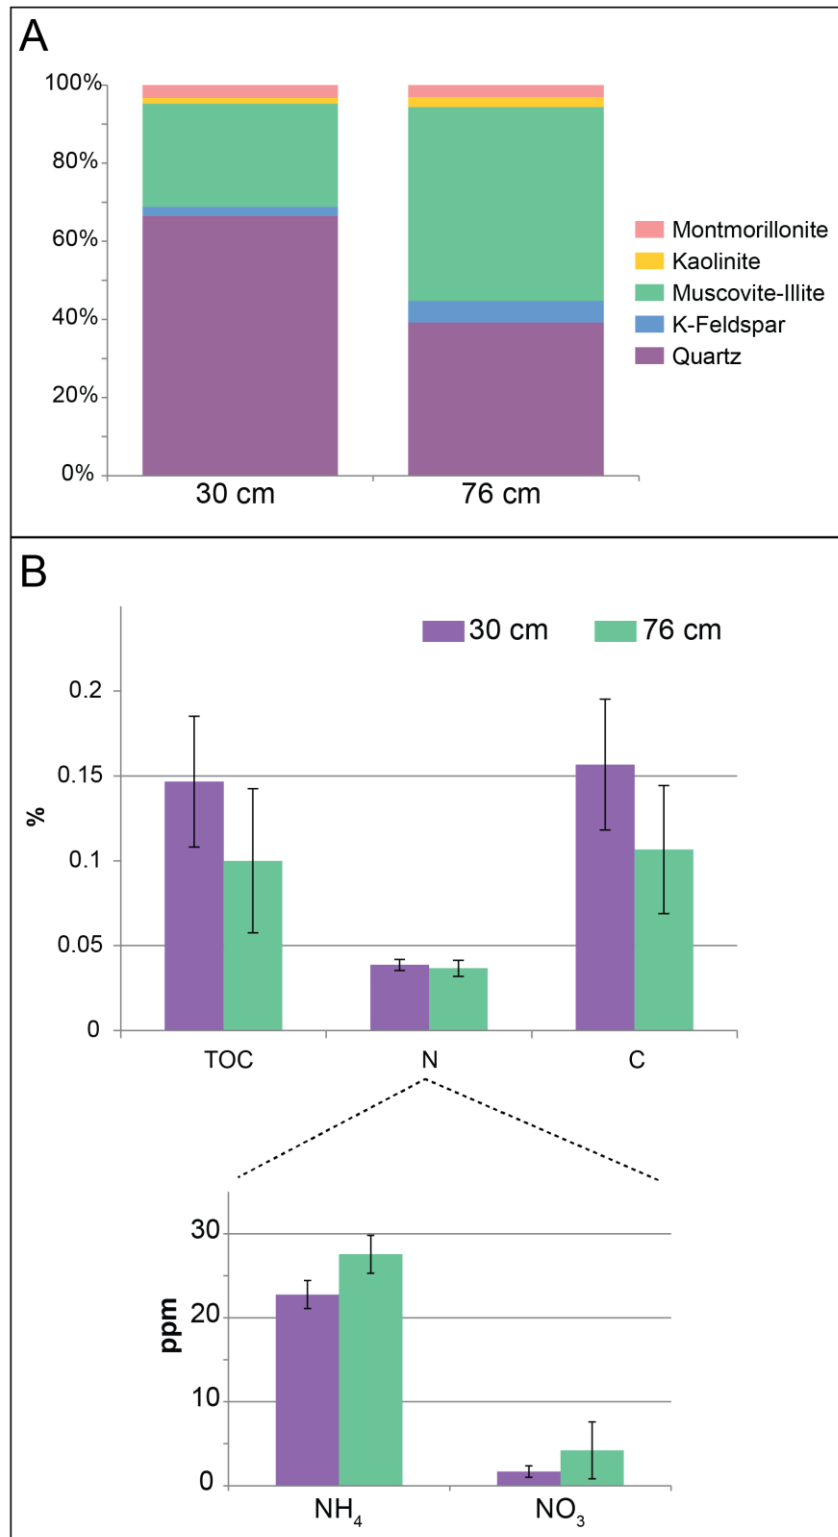

705

706 **Figure S1-Soils properties (A) Mineral composition (B) Total C, TOC, Total N, ammonium and nitrate**

707 concentration (n=3). Ppm, parts per million.

708

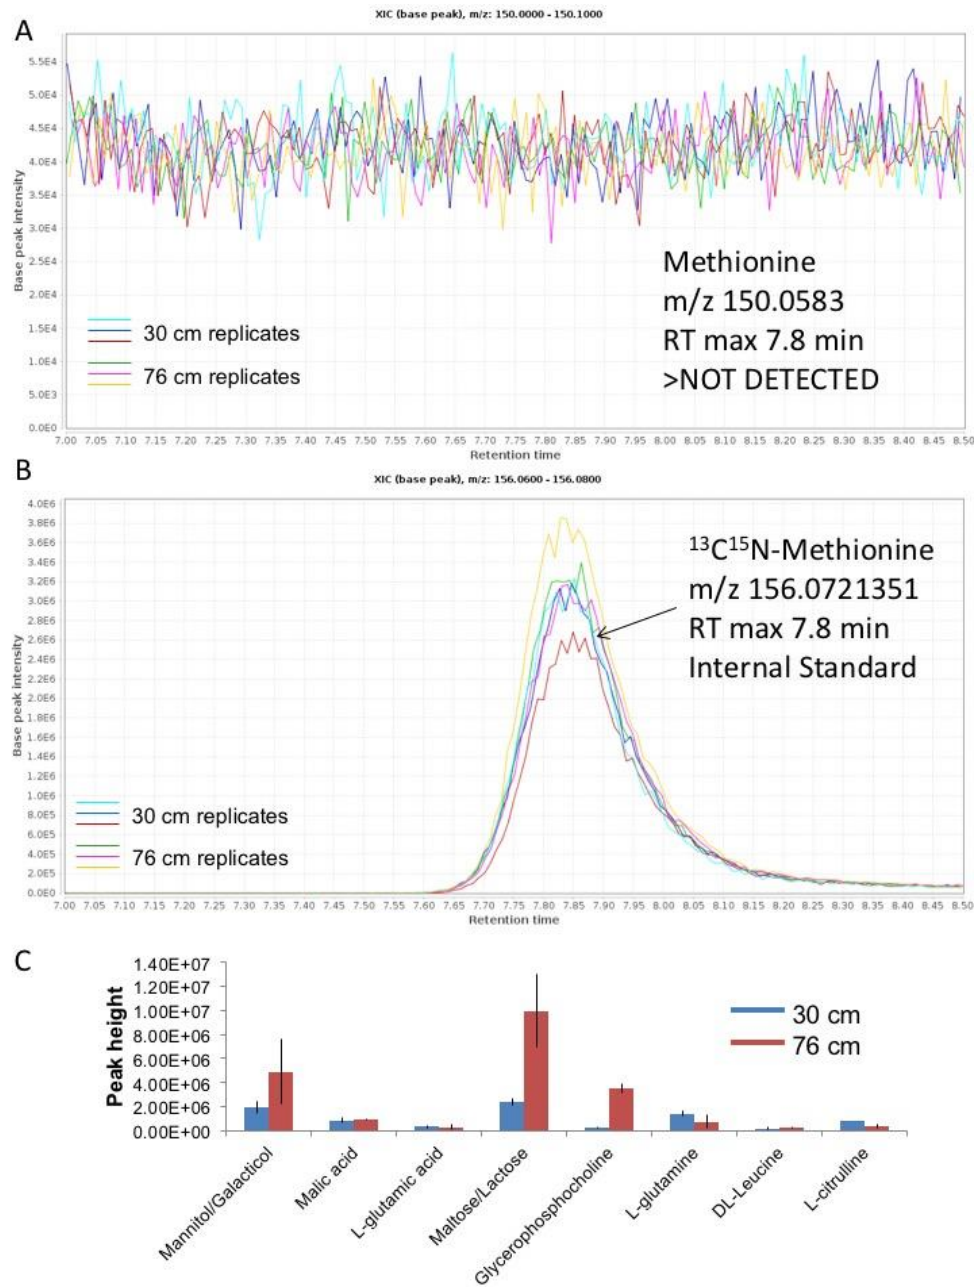

709

710

711 **Figure S2:** LC-MS analysis of the full soil water extract showing that (A) there is no detectable  
712 methionine, although (B) the spiked labeled heavy methionine was easily detected in all samples. (C)  
713 Peak height of the 8 compounds that passed our identification criteria (see methods). Data are means  $\pm$   
714 SD (n=3).

715

716

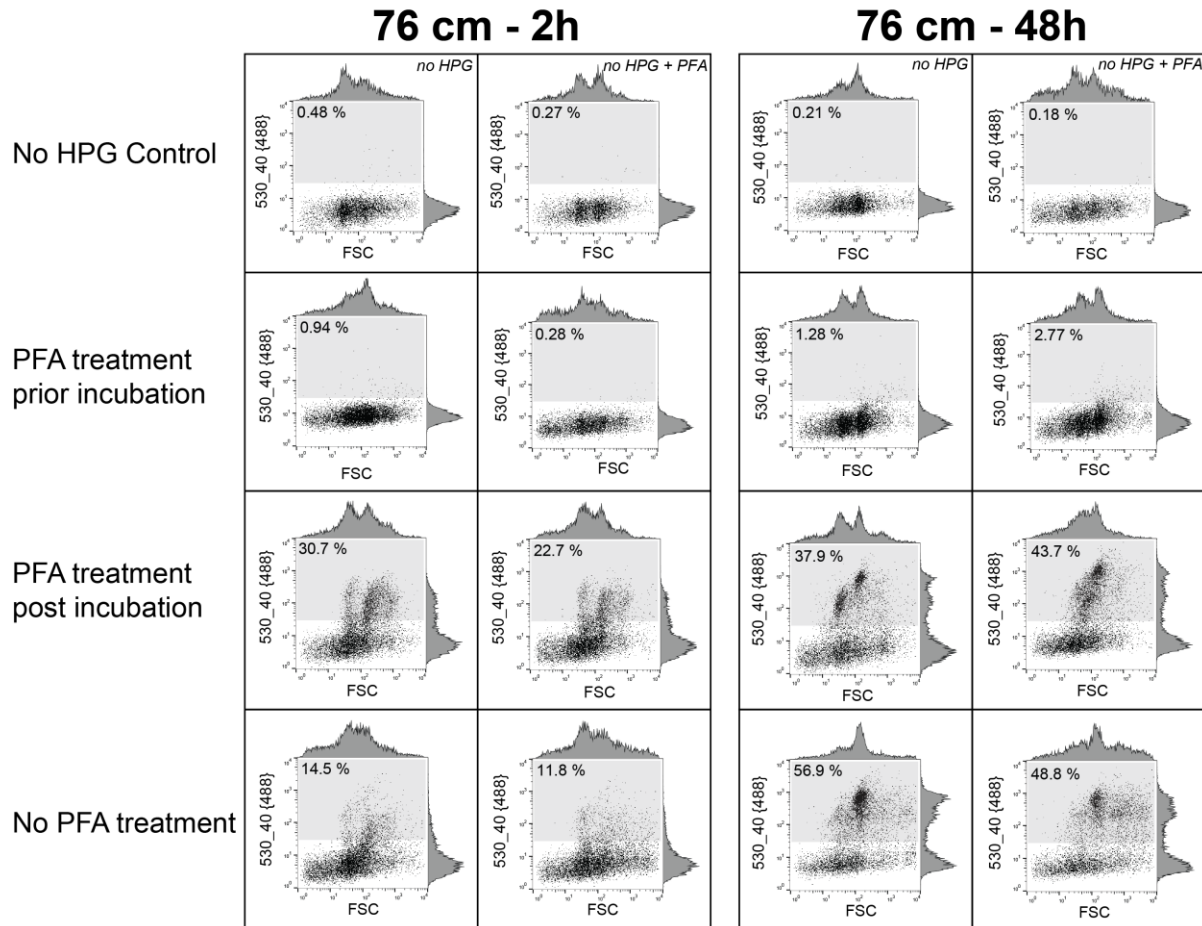

717

718 **Figure S3: BONCAT labeling of fixed and unfixed cells**

719 Cells stained with SYTO dye plotted according to their forward scatter signal (FSC, x-axis) and  
720 BONCAT fluorescence, y-axis) in log-log scale. The distribution of the events along the x and y-axis is  
721 shown respectively on the density plot on the top and on the right of each graph. The BONCAT+ cells  
722 gate is displayed as a gray box in each plot, and the percent cells in the BONCAT+ gate is indicated in the  
723 top left corner of the box. The left two columns are biological replicates from 76 cm soil incubated for 2  
724 h, and the right two for 48 h. Each row of panels corresponds to a different treatment, the first row being  
725 control samples without HPG (with or without PFA fixation), the second corresponds to samples that  
726 were pre-treated with PFA before incubation, while the third corresponds to samples were cells were  
727 fixed with PFA after incubation. The last row corresponds samples that were not fixed, *i.e* the same  
728 treatment used for when sorting and sequencing BONCAT+ and BONCAT- cells (Figure S3).

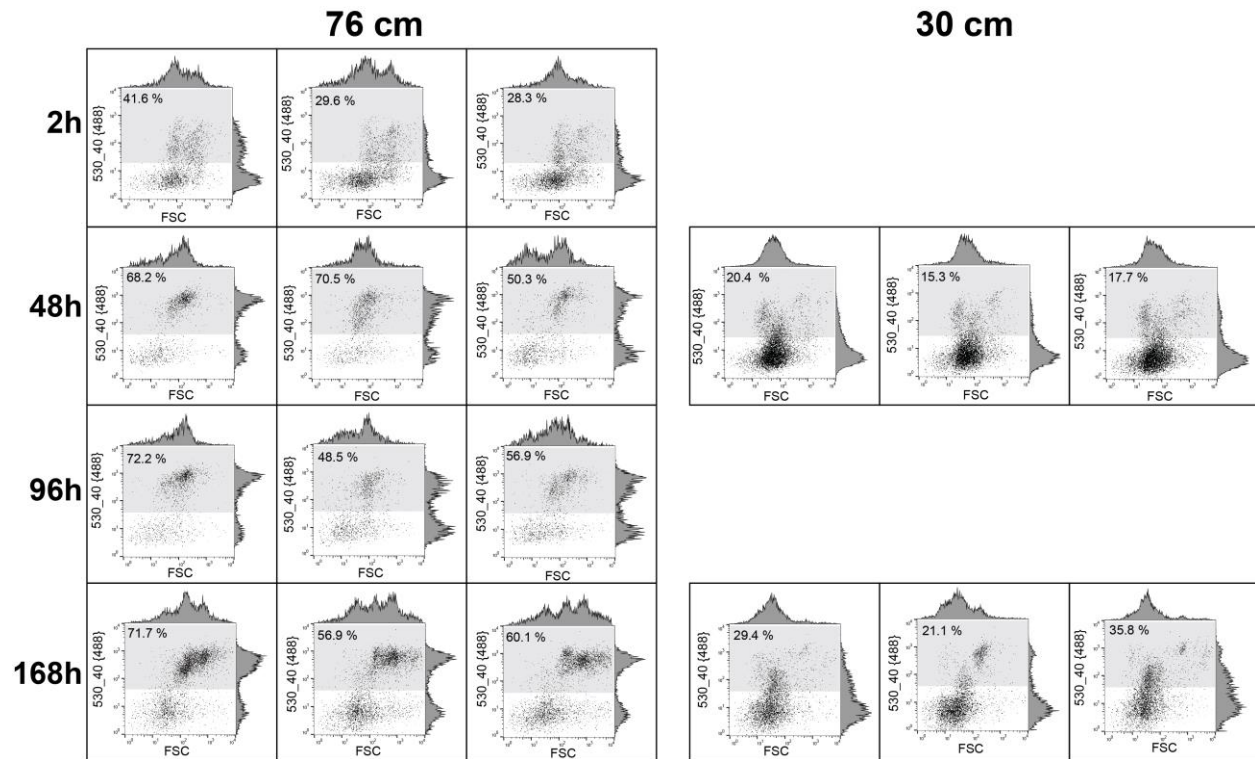

729

730 **Figure S4: Evaluation of BONCAT+ size fraction**

731 Cells stained with SYTO dye plotted according to their forward scatter signal (FSC, x-axis) and  
732 BONCAT fluorescence (Ex: 488nm/Em: 530nm, y-axis) in log-log scale. The distribution of the events  
733 along the x and y-axis is shown respectively on the density plot on the top and on the right of each graph.  
734 The left three columns are biological replicates from 76 cm and the right three from 30 cm soil. Each row  
735 corresponds to an incubation time (2 h to 168 h). The BONCAT+ cells gate is displayed as a gray box in  
736 each plot, and the percent cells in the BONCAT+ gate is indicated in the top left corner of the box.

737

738

739
